# Supplementary material for: Sensitive dependence of trajectories on tracer seeding positions – coherent structures in German Bight backward drift simulations
Source: Copernicus journal article supplement (doi:10.5194/os-17-527-2021), 2021-04-09
Supplement: Supplementary file 2 [file os-17-527-2021-supplement.zip]

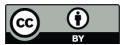

## *Supplement of*

# **Sensitive dependence of trajectories on tracer seeding positions – coherent structures in German Bight backward drift simulations**

**Ulrich Callies**

*Correspondence to:* Ulrich Callies ([ulrich.callies@hereon.de](mailto:ulrich.callies@hereon.de))

- [os-17-527-2021-supplement-title-page.pdf](#)
- [FTLE\\_2016.avi](#)
- [additional\\_figures.pdf](#)

The copyright of individual parts of the supplement might differ from the article licence.
