# Supplementary material for: Sensitive dependence of trajectories on tracer seeding positions – coherent structures in German Bight backward drift simulations
Source: Copernicus journal article supplement (doi:10.5194/os-17-527-2021), 2021-04-09
Supplement: Supplementary file 3 [file os-17-527-2021-supplement.zip]

Archive with 3 entries (3 files):
- FTLE_2016.avi
- os-17-527-2021-supplement-title-page.pdf
- additional_figures.pdf
